## Research Article

# Metabolomic profiling of ovary in mice treated with FSH using ultra performance liquid chromatography/mass spectrometry

Liting Sun\*, Lu Chen\*, Yanwen Jiang, Yun Zhao, Fengge Wang, Xue Zheng, Chunjin Li and Xu Zhou

College of Animal Sciences, Jilin University, Changchun, P.R. China

**Correspondence:** Xu Zhou (xzhou65@vip.sina.com) and Chunjin Li (lccj158@163.com)

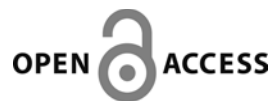

The growth and development of follicles are a very complex physiological process that is regulated by endocrine, autocrine and paracrine mechanisms. The effect of small molecules in follicular microenvironment on follicular growth and development has not been clearly analyzed. In the present study, the metabolic changes in ovaries of FSH-stimulated mice were investigated. Metabolomic profiling of ovary stimulated by FSH were analyzed by ultra-performance liquid chromatography/mass spectrometry and characterized by principal components analysis and orthogonal partial least squares discriminant analysis. Multivariate statistical analysis identified 21 differentially metabolites in positive ion mode and 12 in negative ion mode in the FSH-treated mice compared with the control mice. These results indicated that various types of phosphatidylcholine were changed. Furthermore, the levels of L-Glutamyl 5-phosphate, N-Acetyl-L-aspartic acid, 4-fumarylacetoacetic acid, adenylylselenate and 5'-Methylthioadenosine in the ovaries of the FSH-stimulated mice were decreased. However, the levels of 19-hydroxytestosterone and 5,10-methenyltetrahydrofolic acid were significantly increased in the positive ion mode and negative ion mode, respectively. Thirty-three differential metabolites including fatty acid metabolism, amino acid metabolism and lipid metabolism in the ovaries of mice were affected by FSH injection. The findings of our study provide a new insight into understanding the follicular development.

## Background

The growth and development of ovarian follicles are a very complex physiological process that is regulated by endocrine, autocrine and paracrine mechanisms [1]. The importance of endocrine signals in the regulation of follicular development has long been known. It is generally believed that the follicle-stimulating hormone (FSH) acts primarily to promote proliferation of granulosa cells, follicular growth, expression of luteinizing hormone (LH) receptor and aromatization of androgens to estrogens [2]. Furthermore, the follicular microenvironment also plays a major role in determining the fate of follicles [3]. Molecules in follicular fluids have pivotal effects on follicular development. It is well known that insulin-like growth factor (IGF) promotes the synthesis of estradiol in antral follicles. In contrast, some low molecular-weight IGF-binding proteins have negative effects on the actions of IGFs by binding to them, such as IGFBP-2, IGFBP-4 and IGFBP-5. Meanwhile, it is well established that IGF and FSH work together to promote the production of estradiol [3]. In addition, inhibin A and B, vascular endothelial growth factor [4], lactoferrin [5], hyaluronan [6], leptin [7], 25-OH vitamin D, glucose and IL-8 [8,9], and many others molecules are also thought to be related to the growth and development of follicles.

Recently, metabolomics has been widely used for effectively addressing the roles of the small molecules (<10 kDa) in complex biological activities [10]. Metabolomics has gradually become a complementary

\* These authors contributed equally and are co-first authors.

Received: 23 June 2018  
Revised: 08 September 2018  
Accepted: 20 September 2018

Accepted Manuscript Online:  
04 October 2018

Version of Record published:  
21 November 2018

technique to transcriptomics, genomics and proteomics. Based on liquid chromatography/mass spectrometry (LC/MS), gas chromatography/mass spectrometry (GC/MS) and nuclear magnetic resonance (NMR) spectroscopy, the major analytical platforms are used in metabolomics studies [11]. Among these techniques, as a peak resolution, high sensitivity and reproducibility analytical platform, ultra-performance liquid chromatography coupled to quadrupole time-of-flight mass spectrometry (UPLC-QTOF/MS) has been popularly relied on for the identification and quantification of metabolites [12]. The most metabolites and metabolic pathways among various species are similar. However, mRNAs, genes and proteins have diversity among different species. Therefore, metabolomics is a universal language describing the complex life activities of different species. Metabolites are possibly used to get more information than merely a direct detection of mRNAs (transcriptomes), gene expression (genomics) and proteins (proteomes). As a matter of fact, the gene activation with consequent mRNA and the synthesis of protein are not essentially associated with change of cellular function or morphology; nevertheless, metabolomes indicates the real functional status of the cell in biological system [13]. Small molecular-weight metabolites, as the final products of metabolism of cells, can illustrate all impacts affecting the development of follicle. There are numerous studies on the regulatory mechanism underlying the follicular development, but the changes of metabolic composition during follicular development have yet to be revealed. At the present stage, metabolomics is used to study the follicular fluid and the quality of oocytes for improving *in vitro* fertilization (IVF) [14]. And no metabolomic analysis has been performed on the developing ovary. Our metabolomic analysis of ovarian tissue in mice aims to explore a mechanism with regard to the development of follicles under FSH stimulation.

In the present study, the metabolic changes in the ovaries of FSH-stimulated mice were investigated. To our knowledge, this is the first study to analyze the follicular metabolomic changes in the ovaries of FSH-stimulated mice based on UPLC-QTOF/MS. The present study revealed alterations in fatty acid metabolism, amino acid metabolism, lipid metabolism in the ovaries of mice stimulated by FSH. It will be helpful to understand the mechanisms of the regulation of the growth and development of follicles.

## Materials and methods

### Animals and ovary collection

All animal experiments were approved by the Animal Protection and Utilization Committee of Jilin University. One hundred immature female (3 weeks old) BALB/c mice were achieved from the Medical Department of Jilin University, China. All mice were reared under conditions of controlled temperature (22–24°C) and humidity (60–70%), where they were given food and water *ad libitum* during the 12-h light/dark cycle. All mice were divided into two groups randomly as follows: mice in FSH group were injected intraperitoneally (IP) with FSH (10 IU/mouse; Ningbo Second Hormone Factory, Ningbo, China); mice in control group were injected IP with the same volume of vehicle (0.9% saline solution). After 48 h, the mice were all anesthetized with isoflurane and killed by cervical dislocation, and ovarian tissues were collected. Fifty milligrams of ovary tissue (20 ovaries) was collected for each sample and stored at –80°C until analysis. Five samples were measured for the control group and the FSH group, respectively.

### Specimen pretreatment

Approximately 50 mg ovary tissues were added to 800 µl of methanol. Then, all samples were grinded to fine homogenate using Grinding Millat 65 HZ for 90 s, vortexed for 30 s, centrifuged at 12000 g for 15 min at 4°C. Next, the supernatants (200 µl) were collected to a glass vial for LC-MS analysis.

### LC/MS analysis

All analyses were performed on a Ultra Performance LC system (Waters, U.S.A.) coupled to a Waters Xevo™ G2 Q-TOF mass spectrometer (Waters MS Technologies, U.K.). The injection volume of each sample was 6 µl for each run. And, the mobile phase consisted of 0.1% (v/v) formic acid solution A and 0.1% formic acid in acetonitrile solution B. The gradient conditions were described in 5% acetonitrile for 0 to 1 min; 5–20% acetonitrile for 1 to 6 min; 20–50% acetonitrile for 6 to 9 min; 50–95% acetonitrile for 9 to 13 min; 95% acetonitrile for 13 to 15 min. The flow rate was 0.35 ml/min. Chromatographic separation was set at 40°C on an ACQUITY UPLC T3 column (2.1 mm × 100 mm, 1.8 µm).

Sample analysis was performed using positive or negative electrospray ionization (ESI) mode. For the ESI+ mode, the capillary voltage and the sampling cone were respectively set to 1.4 kV and 40 V. For the ESI– mode, the capillary voltage and the sampling cone were respectively set to 1.3 kV and 23 V. Mass spectrometry detections were operated in either the positive or negative ion mode with a cone gas flow of 50 l/h, desolvation gas flow of 600 l/h, source

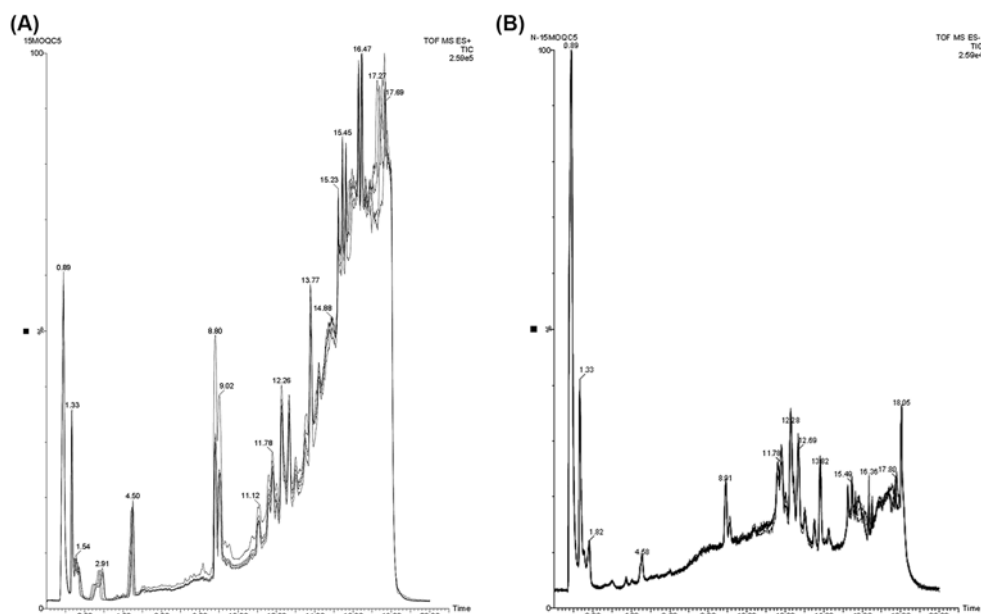

**Figure 1.** Representative total ion chromatogram of QC in positive ion mode (A, ESI+) and negative ion mode (B, ESI–)

temperature of 120°C, desolvation temperature of 350°C, collision energy at 10–40 V, ion energy at 1 V scan time of 0.03 s, inter scan time of 0.02 s and the mass scanning range of 50–1500 m/z.

An equal volume (10  $\mu$ l) of serum was mixed from each ovarian sample as a quality control standard (QCS). QC samples could demonstrate the reliability and stability of the UPLC-QTOF/MS system.

## Data processing and pattern recognition

Before the formal analysis, the data group was normalized to obtain more intuitive and reliable results. The goal of normalization was to make the scale of all variables (a certain digital feature, such as mean and standard deviation) at the same level. The raw data of LC/MS were transformed into a matrix including intensity, time and ion mass (m/z). Baseline correction and peak finding were performed by Progenesis QI data analysis software (Non-Linear Dynamics, Newcastle, U.K.). The resulting scaled datasets were applied to principal component analysis (PCA) firstly. Then, partial least-squares discriminant analysis (PLS-DA) and orthogonal partial least-squares discriminant analysis (OPLS-DA) were used by the SIMCA-P 11.0 version software (Umetrics AB, Umea, Sweden) to obtain clustering information and critical variables between the control group and the FSH group. When the predictive ability was indicated by  $Q^2Y$ , the goodness of the fit was quantified by  $R^2Y$ . MetaboAnalyst 3.0 platform (<http://www.metaboanalyst.ca>) was used to further analyze the resulting datasets. Metabolite peaks were identified by  $MS^E$  analysis and annotated with available biochemical online databases for instance METLIN (<http://metlin.scripps.edu/>), the Kyoto Encyclopedia of Genes, Genomes (KEGG, <http://www.kegg.com/>), and the human metabolite database (HMDB, <http://www.hmdb.ca/>).

In the present study, potential differential metabolites were selected based on the Variable Importance in the Projection threshold ( $VIP > 1$ ). The  $T$ -test was carried out on measurement data, and  $P < 0.05$  was considered significant. All the data of metabolomics analysis were calculated by SPSS22.0 version software.

## Results

### Original chromatogram based on UPLC-QTOF/MS

First, total ion chromatograms (TICs) of the QC samples in the positive or negative modes were analyzed by UPLC/Q-TOF MS, as shown in Figure 1. The good overlapping spectrum of all samples showed that the instrument has repeatability, retention time and stability. The typical TIC of the metabolic profiles of ovarian tissues from FSH-stimulated and control mice in the positive or negative modes were shown in Figure 2. Differences in peak intensities between the FSH group and the control group were observed.

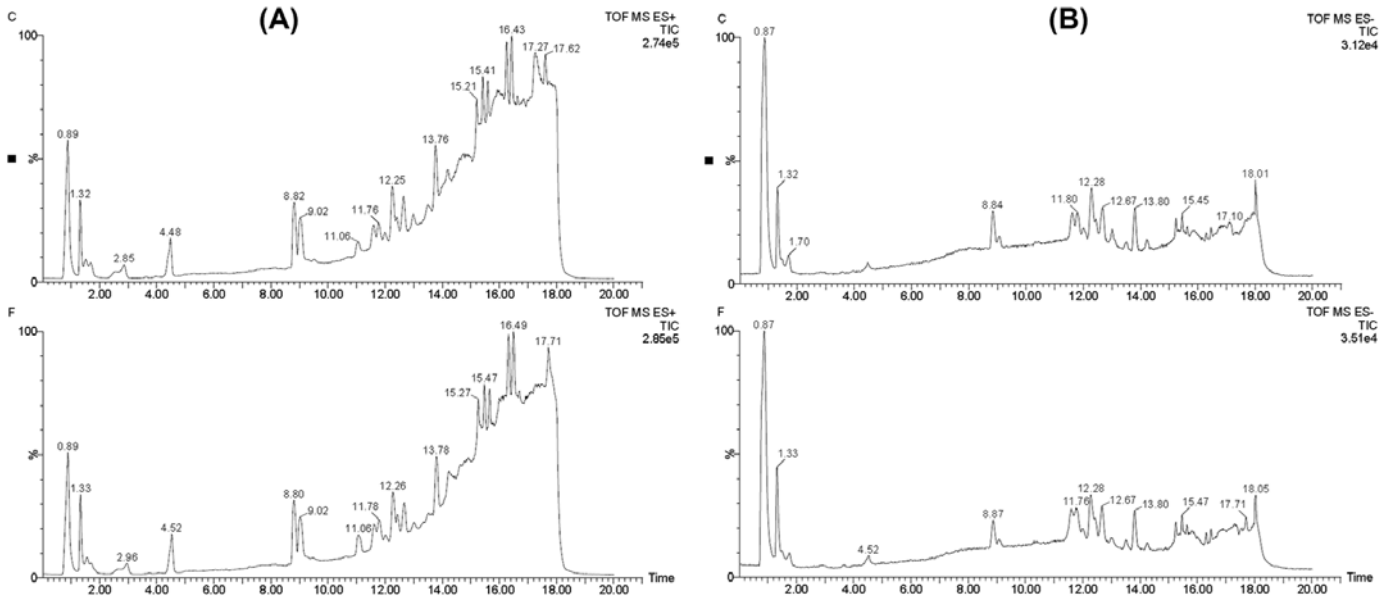

Figure 2. Total ion chromatogram of control group (C) and FSH (F) group. (A, ESI+; B, ESI-)

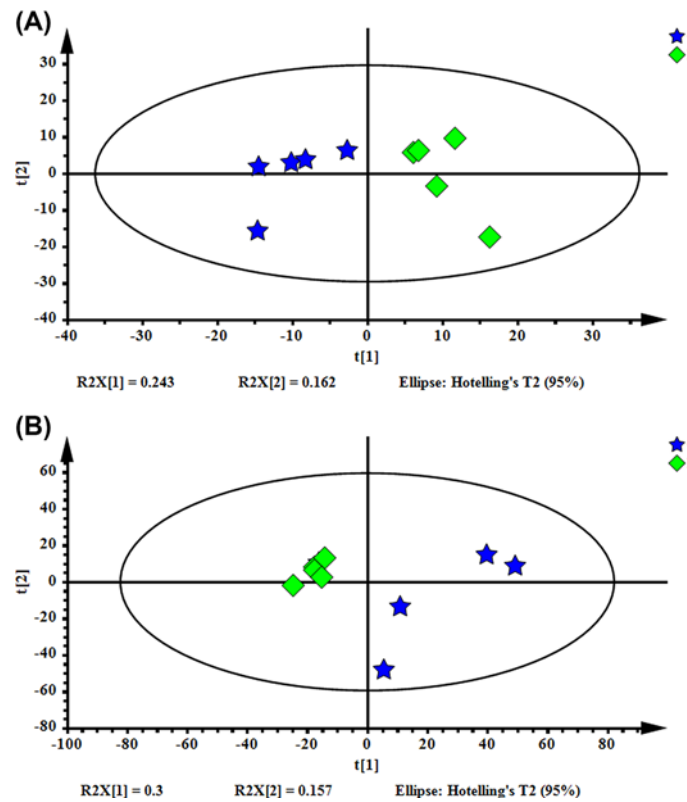

Figure 3. The PCA scores plot of the control group and the FSH group. (A, ESI+,  $R^2X = 0.457$ ,  $Q^2 = -0.0224$ ; B, ESI-,  $R^2X = 0.558$ ,  $Q^2 = -0.0591$ )

### Multivariate statistical analysis

PCA models were used to fully understand the metabolic profile of the mouse ovary. The PCA scores showed that the samples from the FSH group and the control group indicated consistent classification. As shown in Figure 3A,

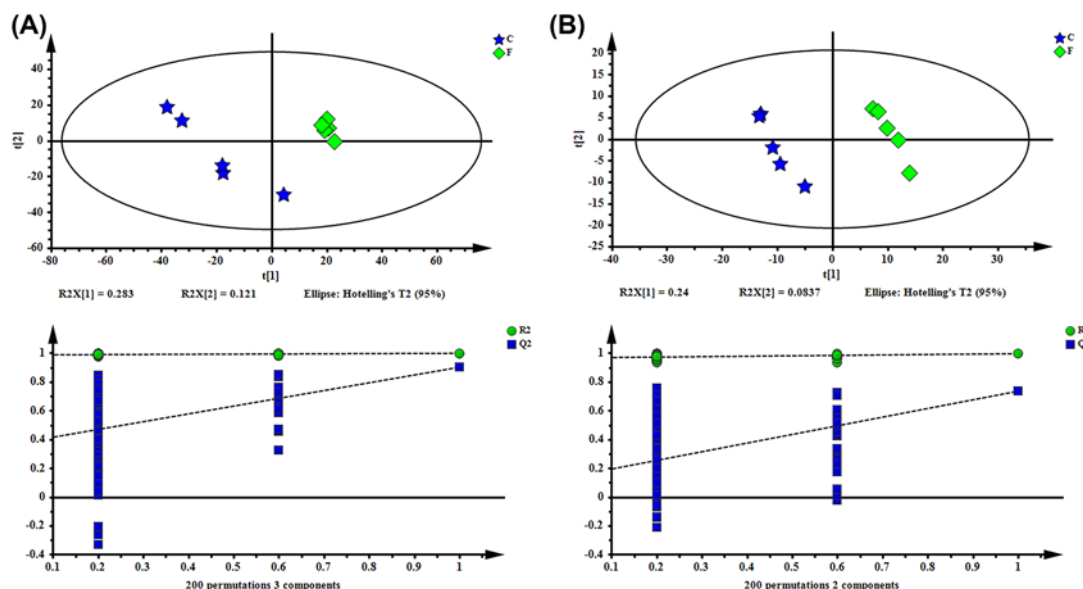

**Figure 4. PLS-DA score plot of the control group and the FSH group**  
 (A, ESI+,  $R^2X = 0.532$ ,  $R^2Y = 0.999$ ,  $Q^2 = 0.902$ ; B, ESI-,  $R^2X = 0.324$ ,  $R^2Y = 0.996$ ,  $Q^2 = 0.736$ ).  $R^2Y$  = The interpretation rate of the model,  $Q^2$  = The prediction rate of the model.

there were two principal components in the positive ion mode and the PCA score plots were characterized by the following parameters:  $R^2X = 0.457$ ,  $Q^2 = -0.0224$ . As shown in Figure 3B, there were three principal components in the negative ion mode and the PCA score plots were characterized by the following parameters:  $R^2X = 0.558$ ,  $Q^2 = -0.0591$ . The results showed that the control group and the FSH group exhibited different metabolic characteristics. The outline view of all samples could be obtained by a PCA score plot. But, the specific changes in each group are still uncertain.

These differences were carried out the supervised multivariate analysis PLS-DA to track detailed differences between the two groups. In general,  $R^2Y$  was an estimate of how good the model fits the Y data, and  $Q^2$  provided an estimate of how good the model predicts the X. In order to obtain a high predictive ability, the  $R^2Y$  and  $Q^2$  values should be close to 1. The scores of PLS-DA plot (Figure 4) showed marked separation between the control and the FSH group. The  $R^2X$  of the PLS-DA model in positive ion modes was 0.532, the  $R^2Y$  was 0.999, and the  $Q^2$  was 0.902. The  $R^2X$  of the PLS-DA model in negative ion modes was 0.324, the  $R^2Y$  was 0.996, and the  $Q^2$  was 0.736. From the PLS-DA model parameters, the model was credible for interpreting the differences and the verification map did not show the phenomenon of 'overfitting' between the two groups. Therefore, these data could be used for subsequent analysis.

The OPLS-DA was used to better detect the metabolic variations in the ovaries of FSH-injected mice. As shown in Figure 5, the following parameters were  $R^2X = 0.765$ ,  $R^2Y = 1$ ,  $Q^2 = 0.743$  in positive ion modes and the following parameters were  $R^2X = 0.324$ ,  $R^2Y = 0.996$ ,  $Q^2 = 0.794$  in the negative ion modes. The OPLS-DA score plot demonstrated a clearer separation of the control group and the FSH group, and content modeling and predictability were achieved when the  $Q^2 > 0.4$ .

## Identification of potential biomarkers and metabolic pathways

First, the variables with VIP value  $> 1$  have a good correlation with separation, which were applied to the candidate list. Then, to select significantly different variables ( $P < 0.05$ ), the  $T$ -test was performed in the following step. The comprehensive results showed that 33 differential metabolites could be annotated by searching the exact mass data ( $m/z$ ) from the most intense peaks against the data of the online database: KEGG (<http://www.kegg.jp/>), METLIN (<http://metlin.scripps.edu/>) and HMDB (<http://www.hmdb.ca/>).

Based on analysis of LC/MS data, as shown in Tables 1 and 2 respectively, there were 21 marker metabolites in the positive ion mode and 12 metabolites in the negative ion mode. For unsupervised clustering, the significantly different metabolites were used to construct a heatmaps. The heatmaps were used to define differential metabolites

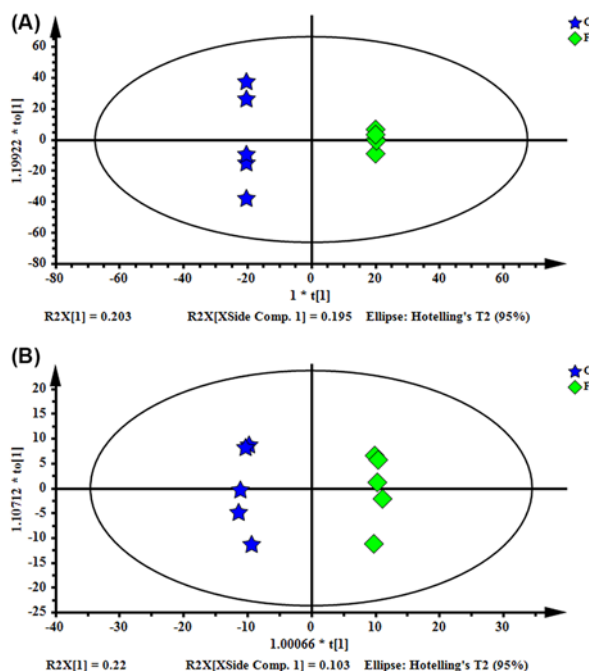

**Figure 5.** OPLS-DA score plot of the control group and the FSH group (A, ESI+; B, ESI-)

in the FSH group and the control group that showed an obvious clustering for two ion modes in consistent with the OPLS-DA results in Figure 6. These results indicated that various types of phosphatidylcholine were changed. PC (14:0/18:1(11Z)), PC (18:3(6Z, 9Z, 12Z)/P-16:0), PC (22:5(4Z, 7Z, 10Z, 13Z, 16Z)/24:1(15Z)), PC (22:2(13Z, 16Z)/22:6(4Z, 7Z, 10Z, 13Z, 16Z, 19Z)), LysoPC (20:1(11Z)), LysoPC (22:0) and LysoPC (22:2(13Z, 16Z)) were increased, whereas the levels of PC (18:3(6Z, 9Z, 12Z)/24:1(15Z)), PC (18:2(9Z, 12Z)/24:1(15Z)), PC (22:0/P-16:0), PC (22:4(7Z, 10Z, 13Z, 16Z)/24:1(15Z)) and LysoPC (16:0) were decreased. To analyze the metabolic pathways that the changed phosphatidylcholines be involved in, linoleic acid metabolism, glycerophospholipid metabolism, arachidonic acid metabolism and  $\alpha$ -inolenic acid metabolism were determined by MetaboAnalyst 3.0 platform. By the way, the results also indicated decreased levels of L-glutamyl 5-phosphate, deoxyadenosine,  $\gamma$ -glutamylcysteine, N-acetyl-L-aspartic acid, 4-fumarylacetoacetic acid, glyceric acid 1,3-biphosphate, adenylylselenate, prostaglandin G2 and 5'-methylthioadenosine in the ovary of the FSH-treated mice compared with the control in the positive ion mode. Besides, the levels of 19-hydroxytestosterone, glycocholic acid and guanosine diphosphate mannose were significantly increased in the positive ion mode. And, the results indicated decreased levels of PE (14:0/20:3(8Z, 11Z, 14Z)), UDP-D-Xylose and lysophosphatidic acid (LPA) (0:0/18:2(9Z, 12Z)) in the ovary of the FSH-treated mice compared with the control in the negative ion mode. The levels of inosine, nervonic acid, D-glucono-1,5-lactone 6-phosphate, 6-hydroxy-5-methoxyindole glucuronide, PE (24:0/24:1(15Z)) and 5,10-methenyltetrahydrofolic acid were significantly increased in the negative ion mode. These metabolites mainly contribute to the metabolic pathways of fatty acid, amino acid and lipid.

## Discussion

Metabolomics, especially LC/MS-based metabolomics, is an emerging analytical tool in the research on components of follicular fluid, due to the comprehensive and quantitative measurement of many metabolic biomarkers in biological samples [14]. This metabolomics study based on UPLC/Q-TOF MS of ovaries of mice stimulated by FSH identified 21 marker metabolites in the positive ion mode and 12 metabolites in the negative ion mode. They represented fluctuations in multiple pathways, such as fatty acid metabolism, amino acid metabolism and lipid metabolism. Various types of phosphatidylcholine that are involved in glycerophospholipid metabolism were changed. LysOPC (16:0) is derived from the enzyme phospholipase A2 hydrolyzing phosphatidylcholine and is involved in the deacylation/reacylation cycle, regulating molecular species composition. In addition, phosphatidylcholine plays an important role in lipid signaling through the interaction of the lysophospholipid receptor (LPL-R) [15]. LPA is a phospholipid with a wide range of biological functions, such as cell proliferation, differentiation [16] and cell-cell interactions [17].

**Table 1** The significantly different metabolites and pathway between control group and FSH group at ESI+

| No. | RT (min) | Name                                         | Molecular weight | VIP  | T-test | Fold change (FSH/Control) | Pathway name                                                                                                       |
|-----|----------|----------------------------------------------|------------------|------|--------|---------------------------|--------------------------------------------------------------------------------------------------------------------|
| 1   | 0.80     | L-glutamyl 5-phosphate                       | 227.0195         | 1.54 | 0.027  | -0.10                     | Arginine and proline metabolism                                                                                    |
| 2   | 9.29     | Deoxyadenosine                               | 251.1018         | 1.60 | 0.019  | -0.06                     | Purine metabolism                                                                                                  |
| 3   | 9.44     | γ-Glutamylcysteine                           | 250.0623         | 1.91 | 0.001  | -0.32                     | γ-Glutamylcysteine                                                                                                 |
| 4   | 11.07    | PC (14:0/18:1 (11Z))                         | 731.5465         | 1.52 | 0.028  | 0.19                      | Glycerophospholipid metabolism; Linoleic acid metabolism; Arachidonic acid metabolism; α-Linolenic acid metabolism |
| 5   | 11.66    | Glycocholic acid                             | 465.3090         | 1.57 | 0.023  | 0.07                      | Primary bile acid biosynthesis                                                                                     |
| 6   | 11.70    | PC (18:3 (6Z, 9Z, 12Z)/P-16:0)               | 739.5516         | 1.47 | 0.036  | 0.16                      | Glycerophospholipid metabolism; Linoleic acid metabolism; Arachidonic acid metabolism; α-Linolenic acid metabolism |
| 7   | 11.91    | N-Acetyl-L-aspartic acid                     | 175.0481         | 1.92 | 0.001  | -0.14                     | Alanine, aspartate and glutamate metabolism                                                                        |
| 8   | 11.92    | 4-Fumarylacetoacetic acid                    | 200.0321         | 1.71 | 0.009  | -0.11                     | Tyrosine metabolism                                                                                                |
| 9   | 12.12    | Glyceric acid 1, 3-biphosphate               | 265.9593         | 1.57 | 0.022  | -0.20                     | Glycolysis or gluconeogenesis                                                                                      |
| 10  | 12.28    | PC (18:3 (6Z, 9Z, 12Z)/24:1 (15Z))           | 865.6561         | 1.83 | 0.003  | -0.17                     | Glycerophospholipid metabolism; Linoleic acid metabolism; Arachidonic acid metabolism; α-Linolenic acid metabolism |
| 11  | 12.66    | Adenylylselenate                             | 474.9644         | 1.66 | 0.013  | -0.13                     | Selenoamino acid metabolism                                                                                        |
| 12  | 13.12    | PC (22:5 (4Z, 7Z, 10Z, 13Z, 16Z)/24:1 (15Z)) | 917.6874         | 1.52 | 0.029  | 0.57                      | Glycerophospholipid metabolism; Linoleic acid metabolism; Arachidonic acid metabolism; α-Linolenic acid metabolism |
| 13  | 13.17    | Guanosine diphosphate mannose                | 605.0772         | 1.41 | 0.049  | 0.26                      | N-Glycan biosynthesis; Amino sugar and nucleotide sugar metabolism; Fructose and mannose metabolism                |
| 14  | 13.27    | 19-Hydroxytestosterone                       | 304.2038         | 1.93 | 0.001  | 0.71                      | Steroid hormone biosynthesis                                                                                       |
| 15  | 13.28    | LysoPC (20:1 (11Z))                          | 549.3794         | 1.55 | 0.025  | 0.33                      | Glycerophospholipid metabolism                                                                                     |
| 16  | 13.38    | Prostaglandin G2                             | 368.2199         | 1.68 | 0.012  | -0.22                     | Arachidonic acid metabolism                                                                                        |
| 17  | 13.80    | PC (18:2 (9Z, 12Z)/24:1 (15Z))               | 867.6717         | 1.47 | 0.037  | -0.36                     | Glycerophospholipid metabolism; Linoleic acid metabolism; Arachidonic acid metabolism; α-Linolenic acid metabolism |
| 18  | 14.25    | PC (22:0/P-16:0)                             | 801.6611         | 1.73 | 0.008  | -0.24                     | Glycerophospholipid metabolism; Linoleic acid metabolism; Arachidonic acid metabolism; α-Linolenic acid metabolism |
| 19  | 16.05    | PC (22:4 (7Z, 10Z, 13Z, 16Z)/24:1 (15Z))     | 919.7030         | 1.54 | 0.027  | -0.17                     | Glycerophospholipid metabolism; Linoleic acid metabolism; Arachidonic acid metabolism; α-Linolenic acid metabolism |
| 20  | 16.22    | 5'-Methylthioadenosine                       | 297.0896         | 1.68 | 0.012  | -0.17                     | Cysteine and methionine metabolism                                                                                 |
| 21  | 18.11    | LysoPC (16:0)                                | 495.3325         | 1.44 | 0.042  | -0.29                     | Glycerophospholipid metabolism                                                                                     |

**Table 2** The significantly different metabolites and pathway between control group and FSH group at ESI

| No. | RT (min) | Name                                                   | Molecular weight | VIP  | T-test | Fold change (FSH/Control) | Pathway Name                                                                                                       |
|-----|----------|--------------------------------------------------------|------------------|------|--------|---------------------------|--------------------------------------------------------------------------------------------------------------------|
| 1   | 0.83     | PE (14:0/20:3 (8Z, 11Z, 14Z))                          | 713.4996         | 1.41 | 0.038  | -0.11                     | Glycosylphosphatidylinositol (GPI)-anchor biosynthesis                                                             |
| 2   | 1.35     | Inosine                                                | 268.0808         | 1.48 | 0.026  | 0.20                      | Purine metabolism                                                                                                  |
| 3   | 1.52     | Nervonic acid                                          | 366.3498         | 1.61 | 0.012  | 0.14                      | Biosynthesis of unsaturated fatty acids                                                                            |
| 4   | 7.57     | D-Glucono-1,5-lactone 6-phosphate                      | 258.0141         | 1.38 | 0.043  | 0.24                      | Pentose phosphate pathway                                                                                          |
| 5   | 11.78    | LysoPC (22:0)                                          | 579.4264         | 1.41 | 0.037  | 0.11                      | Glycerophospholipid metabolism                                                                                     |
| 6   | 12.62    | UDP-D-Xylose                                           | 536.0445         | 1.69 | 0.007  | -0.33                     | Amino sugar and nucleotide sugar metabolism                                                                        |
| 7   | 13.05    | LPA (0:0/18:2 (9Z, 12Z))                               | 434.2433         | 1.44 | 0.032  | -0.18                     | Glycerolipid metabolism                                                                                            |
| 8   | 15.22    | 6-Hydroxy-5-methoxyindole glucuronide                  | 339.0954         | 1.38 | 0.043  | 0.17                      | Pentose and glucuronate interconversions                                                                           |
| 9   | 15.78    | LysoPC (22:2 (13Z, 16Z))                               | 575.3951         | 1.70 | 0.006  | 0.15                      | Glycerophospholipid metabolism                                                                                     |
| 10  | 15.81    | PC (22:2 (13Z, 16Z)/22:6 (4Z, 7Z, 10Z, 13Z, 16Z, 19Z)) | 885.6248         | 1.89 | 0.001  | 0.44                      | Glycerophospholipid metabolism; Linoleic acid metabolism; α-Linolenic acid metabolism; Arachidonic acid metabolism |
| 11  | 17.20    | PE (24:0/24:1 (15Z))                                   | 913.7500         | 1.40 | 0.039  | 0.18                      | Glycosylphosphatidylinositol (GPI)-anchor biosynthesis                                                             |
| 12  | 18.03    | 5,10-ethenyltetrahydrofolic acid                       | 455.1553         | 2.12 | 0.000  | 0.79                      | One carbon pool by folate; Glyoxylate and dicarboxylate metabolism                                                 |

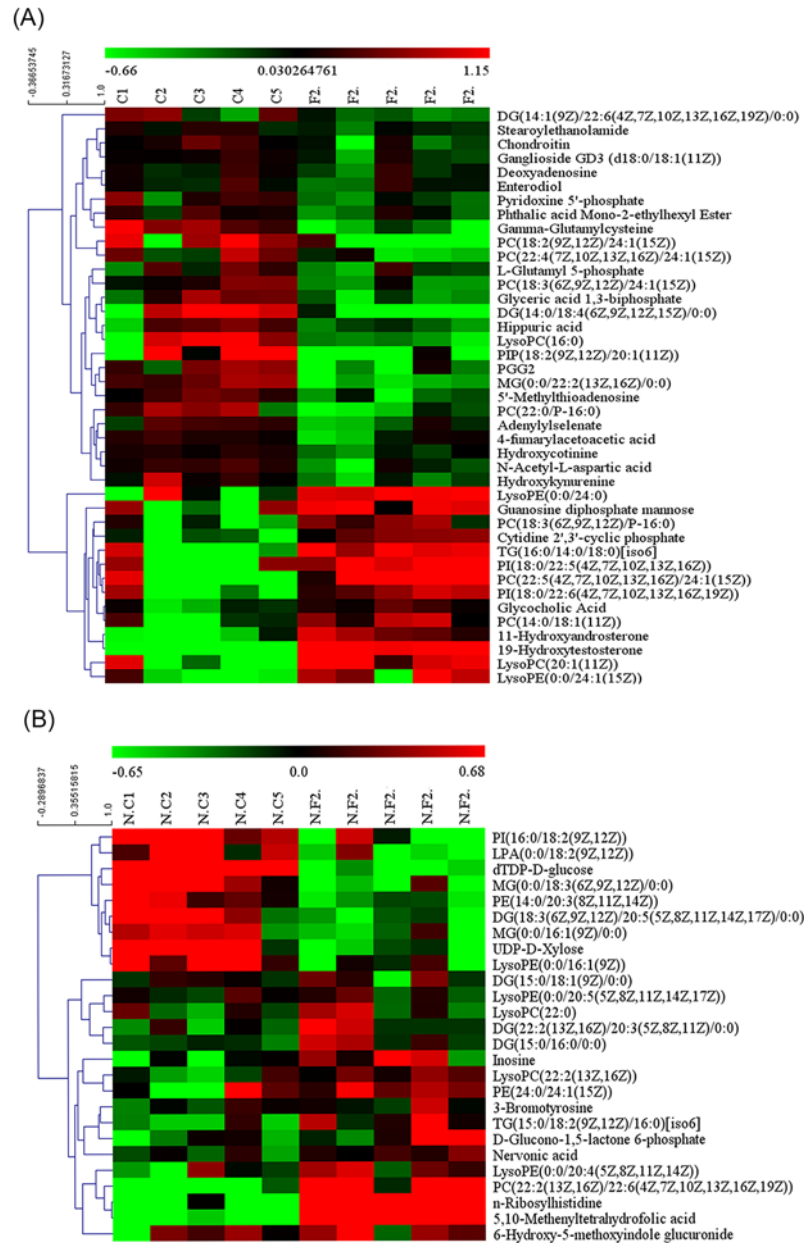

**Figure 6. Heat map of differential metabolites**

Heatmaps representing the significantly changed metabolites between FSH group and the corresponding control group in ESI+ mode **(A)** and ESI- mode **(B)**. In the figure, red indicates high content, green indicates low content, rows indicate differential substances, and columns indicate samples.

LPA is also a local factor regulating female reproductive function. Previous studies have documented that LPA plays a role in the reproductive systems of mice, sows, ewes and cows [18–21]. And a study reported the function of LPA as the local regulator of cow reproduction in follicular fluid [22]. Sinderewicz et al. [23] observed the probable link between LPA action and the factors related to the growth and development of bovine follicles, depending on the follicular type. While previous study has demonstrated that the lipids are bioactive compounds and relate to oocyte development [24]. In the present study, the LPA level was decreased by FSH stimulation. Thus, LPA may be involved in the development of ovarian follicles.

19-Hydroxytestosterone is an intermediate product of androgen and estrogen metabolism. It is produced from testosterone by the enzyme cytochrome P450 and then converted into 19-oxo testosterone [25]. In the present



study, a higher level of 19-hydroxytestosterone was observed in the FSH group. FSH can activate aromatase in follicular granulosa cells. Thecal cells provide 19-hydroxytestosterone under the action of LH. Some substrates, like 19-hydroxytestosterone, enter the granulosa cells through the basement membrane and are converted into estradiol-17 $\beta$  by activated aromatase [26]. The theca interna of follicles produces only a small amount of estrogen. Estrogens synergized with FSH stimulation regulate granulosa cell proliferate, follicular fluid form and follicular cavity expansion, thereby modulate follicles growth and development [27].

Cyclooxygenase (COX), also known as prostaglandin synthase, has a very important role in the regulation of synthesis of prostanoids. Cyclooxygenase can catalyze the production of prostaglandin G<sub>2</sub> (PGG<sub>2</sub>) from arachidonic acid. PGG<sub>2</sub> can further generate prostaglandin H<sub>2</sub> under the catalysis of peroxidase. Prostaglandin H<sub>2</sub> can produce different end products under the action of downstream cell-specific enzymes, of which prostaglandin E<sub>2</sub> (PGE<sub>2</sub>) is a kind of end product [28,29]. PGE<sub>2</sub>, as one of the key paracrine factors of LH pathway, is mainly expressed by the granulosa cells of the follicles at developmental stages [30]. PGE<sub>2</sub> acts on the cumulus cells by binding with two kinds of receptors: the prostaglandin receptor 2 (PTGER2) and the prostaglandin receptor 4 (PTGER4) [31]. In the present study, PGG<sub>2</sub> remarkably decreased in the FSH group compared with the control group. Lau et al. [32] showed that FSH/LH can promote PGE<sub>2</sub> production in ovarian cancer cells at the protein and mRNA level through COX-1 and COX-2 up-regulation. Cai et al. [33] reported that PGE<sub>2</sub> stimulates the expression of *Cyp 19* in rat granulosa cells of preovulatory follicles. The study also suggests that the role of PGE<sub>2</sub> is mediated by activation the cAMP/PKA pathway [34]. Activation of PTGER4 induces follicle development at a level comparable to that induced by FSH [34]. The present study supports these findings and suggests that PGG<sub>2</sub> may contribute to the synthesis of PGE<sub>2</sub> and may be indirectly involved in the growth and development of follicles in FSH-treated mice.

5,10-Methenyltetrahydrofolate (5,10-Methenyl-THF) is a form of tetrahydrofolate that is an intermediate metabolite of metabolism of one carbon pool by folate. In the present study, the level of 5,10-methenyltetrahydrofolic acid remarkably increased in the FSH-treated mice compared with that of control group. As one of important group B vitamins, folate is an essential nutrient for the body and is involved in various biochemical and metabolic reactions. Studies have shown that as an important methyl donor in the carbon metabolism cycle, folate has an important impact on pregnancy, pregnancy complications and birth defects. Further studies have shown that in the folate metabolic pathway, the gene polymorphism and folic acid metabolism of a key enzyme, 5,10-methylenetetrahydrofolate reductase (MTHFR), play an important role in ovarian function. Gene polymorphism and the high homocysteine levels caused by MTHFR can lead to the damage of reproductive function and endocrine function, including follicular development, embryonic development and hormone secretion [35]. With the deep understanding of folate metabolism, MTHFR gene polymorphism may become a new genetic marker for predicting the risk of disease and a new target for related gene therapies [35]. The potential role of the MTHFR gene in regulating ovarian follicular activity is unclear. Rosen et al. [36] reported that MTHFR polymorphisms might associate with granulosa cells activity in growing follicles.

Bile acids are steroid acids found mainly in the bile of mammals and other vertebrates. Bile acid synthesis occurs in liver cells that synthesize primary bile acids by cytochrome P450-mediated oxidation of cholesterol. Bile acids also have hormonal actions throughout the body [37]. It is well known that cholesterol is high in human follicles, and it is used to form sex steroids [38–40]. Of particular interest, Smith et al. [41] provided the first evidence that the key enzymes of both the classical bile acid synthetic pathway and replaced synthetic pathways are present in oocytes and ovarian granulosa cells. Meanwhile, bile acids are produced by human follicular granulocytes in response to the presence of cholesterol in the culture medium in their study. In agreement with this finding, our study observed a decreased metabolite of glycocholic acid involved in primary bile acid biosynthesis pathway in FSH group. However, it is unclear whether bile acids are mainly synthesized by granulosa cells, oocytes or both. Further researches are needed on this aspect.

The present study indicates that the levels of deoxyadenosine and inosine involved in purine metabolism were changed. Purine metabolism plays an important role in energy metabolism [42]. There have been increasing interest in the purine metabolites and their effects in follicular fluid, since the 1980s. Lavy and colleagues studied the levels of purine metabolites in human follicles from both natural and stimulation cycles and noted that adenosine was an inhibitor of human oocyte maturation [43]. A recent study has reported the biochemical relationship between the levels of purines in follicular fluid and follicular/oocyte maturity in human [44]. In this study, the decreased deoxyadenosine and the increased inosine in the FSH group were found, suggested that purine metabolism was promoted by FSH stimulation.

## Conclusion

A metabolomic profiling of ovary in mice treated with FSH was studied based on UPLC Q-TOF/MS technique. As a result, 33 differential metabolites including fatty acid metabolism, amino acid metabolism, lipid metabolism in the ovaries of mice were affected by FSH injection. To our knowledge, the present study first investigates the effect of the FSH on metabolomic profiles in the ovary of mice, which is helpful to understand the mechanism in ovarian follicular development.

## Competing Interests

The authors declare that there are no competing interests associated with the manuscript.

## Funding

This work was supported by the National Natural Science Foundation of China [31372308]; The Natural Science Foundation of Jilin Province [20160520053JH]; The Science and Technology Development Project of Changchun [17DY022]; Cooperation Project of Jilin Province and Jilin University [SXGJXX2017-11]; and Jilin Key Programs for Science and Technology Development [20170204039NY]

## Author Contribution

Lu Chen and Yanwen Jiang conceived and designed the experiments. Yanwen Jiang, Yun Zhao, Fengge Wang and Xue Zheng performed the experiments. Liting Sun was in charge of statistical analysis and writing of the manuscript. Chunjin Li and Xu Zhou were in charge of discussion and comments on an earlier version of the manuscript. All authors read and approved the final manuscript.

## Abbreviations

5,10-Methenyl-THF, 5,10-Methenyltetrahydrofolate; CE/MS, capillary electrophoresis/mass spectrometry; COX, cyclooxygenase; *Cyp19*, cytochrome P450, family 19; ESI, electrospray ionization; FSH, follicle stimulating hormone; GC/MS, gas chromatography/mass spectrometry; IGF, insulin-like growth factor; IVF, *in vitro* fertilization; LC/MC, liquid chromatography/mass spectrometry; LH, luteinizing hormone; LPA, lysophosphatidic acid; LPL-R, lysophospholipid receptor; MTHFR, 5,10-methylenetetrahydrofolate reductase; NMR, nuclear magnetic resonance; OPLS-DA, orthogonal partial least squares discriminant analysis; PCA, principal components analysis; PGE2, prostaglandin E2; PLS-DA, principal components analysis; PTGER2, prostaglandin receptor 2; PTGER4, prostaglandin receptor 4; QCS, quality control standard; TIC, total ion current; UPLC-QTOF/MS, ultra performance liquid chromatography coupled with quadrupole time-of-flight mass spectrometry; VIP, variable importance in the projection.

## References

- Hirshfield, A.N. (1991) Development of follicles in the mammalian ovary. *Int. Rev. Cytol.* **124**, 43–101
- Chateau, D., Geiger, J.M., Samama, B. and Boehm, N. (2009) Vaginal keratinization during the estrous cycle in rats: a model for evaluating retinoid activity. *Skin Pharmacol. Physiol.* **9**, 9–16, <https://doi.org/10.1159/000211385>
- Fortune, J.E., Rivera, G.M. and Yang, M.Y. (2004) Follicular development: the role of the follicular microenvironment in selection of the dominant follicle. *Anim. Reprod. Sci.* **82**, 109–126, <https://doi.org/10.1016/j.anireprosci.2004.04.031>
- Kafsack, B.F. and Llinás, M. (2010) Eating at the table of another: metabolomics of host-parasite interactions. *Cell Host Microbe* **7**, 90, <https://doi.org/10.1016/j.chom.2010.01.008>
- Ocal, P., Aydin, S., Cepni, I., Idil, S., Idil, M., Uzun, H. et al. (2004) Follicular fluid concentrations of vascular endothelial growth factor, inhibin a and inhibin b in IVF cycles: are they markers for ovarian response and pregnancy outcome? *Eur. J. Obstetrics Gynecol.* **115**, 194, <https://doi.org/10.1016/j.ejogrb.2004.01.034>
- Yanaiharu, A., Mitsukawa, K., Iwasaki, S., Otsuki, K., Kawamura, T. and Okai, T. (2007) High concentrations of lactoferrin in the follicular fluid correlate with embryo quality during *in vitro* fertilization cycles. *Fertil. Steril.* **87**, 279–282, <https://doi.org/10.1016/j.fertnstert.2006.06.025>
- Saito, H., Saito, T., Kaneko, T., Sasagawa, I., Kuramoto, T. and Hiroi, M. (2000) Relatively poor oocyte quality is an indication for intracytoplasmic sperm injection. *Fertil. Steril.* **73**, 465–469, [https://doi.org/10.1016/S0015-0282\(99\)00547-6](https://doi.org/10.1016/S0015-0282(99)00547-6)
- Gürbüz, B., Yalti, S., Ficioglu, C. and Taşdemir, S. (2005) The relation of serum and follicular fluid leptin and ovarian steroid levels in response to induction of ovulation in *in vitro* fertilization cycles. *Eur. J. Obstetrics Gynecol.* **118**, 214–218, <https://doi.org/10.1016/j.ejogrb.2004.04.038>
- Anifandis, G.M., Dafopoulos, K., Messini, C.I., Chalvatzas, N., Liakos, N., Pournaras, S. et al. (2010) Prognostic value of follicular fluid 25-oh vitamin d and glucose levels in the IVF outcome. *Reproductive Biol. Endocrinol.* **8**, 1–5, <https://doi.org/10.1186/1477-7827-8-91>
- Malizia, B.A., Wook, Y.S., Penzias, A.S. and Ushuva, A. (2010) The human ovarian follicular fluid level of interleukin-8 is associated with follicular size and patient age. *Fertil. Steril.* **93**, 537–543, <https://doi.org/10.1016/j.fertnstert.2008.11.033>
- Olszewski, K.L., Morrissey, J.M., Wilinski, D., Burns, J.M., Vaidya, A.B., Rabinowitz, J.D. et al. (2009) Host-parasite interactions revealed by plasmodium falciparum metabolomics. *Cell Host Microbe* **5**, 191–199, <https://doi.org/10.1016/j.chom.2009.01.004>

- 12 Rainville, P.D., Simeone, J.L., McCarthy, S.M., Smith, N.W., Cowan, D. and Plumb, R.S. (2012) Investigation of microbore uplc and nontraditional mobile phase compositions for bioanalytical lc-ms/ms. *Bioanalysis* **4**, 1287, <https://doi.org/10.4155/bio.12.78>
- 13 Revelli, A., Piane, L.D., Casano, S., Molinari, E., Massobrio, M. and Rinaudo, P. (2009) Follicular fluid content and oocyte quality: from single biochemical markers to metabolomics. *Reprod. Biol. Endocrinol.* **7**, 1–13, <https://doi.org/10.1186/1477-7827-7-40>
- 14 Xia, L., Zhao, X., Sun, Y., Hong, Y., Gao, Y. and Hu, S. (2014) Metabolomic profiling of human follicular fluid from patients with repeated failure of in vitro fertilization using gas chromatography/mass spectrometry. *Int. J. Clin. Exp. Pathol.* **7**, 7220–7229
- 15 Piñero-Sagredo, E., Nunes, S., Mj, D. L.S., Celda, B. and Esteve, V. (2010) Nmr metabolic profile of human follicular fluid. *NMR Biomed.* **23**, 485–495, <https://doi.org/10.1002/nbm.1488>
- 16 Sun, Z., Wu, H., Lian, F., Zhang, X., Pang, C., Guo, Y. et al. (2017) Human follicular fluid metabolomics study of follicular development and oocyte quality. *Chromatographia* **80**, 901–909, <https://doi.org/10.1007/s10337-017-3290-6>
- 17 Pustilnik, T.B., Estrella, V., Wiener, J.R., Mao, M., Eder, A., Watt, M.A. et al. (1999) Lysophosphatidic acid induces urokinase secretion by ovarian cancer cells. *Clin. Cancer Res.* **5**, 3704
- 18 Fukushima, N., Weiner, J.A., Kaushal, D., Contos, J.J., Rehen, S.K., Kingsbury, M.A. et al. (2002) Lysophosphatidic acid influences the morphology and motility of young, postmitotic cortical neurons. *Mol. Cell. Neurosci.* **20**, 271–282, <https://doi.org/10.1006/mcne.2002.1123>
- 19 Murdoch, W.J., Peterson, T.A., Van Kirk, E.A., Vincent, D.L. and Inskeep, E.K. (1986) Interactive roles of progesterone, prostaglandins, and collagenase in the ovulatory mechanism of the ewe. *Biol. Reprod.* **35**, 1187, <https://doi.org/10.1095/biolreprod35.5.1187>
- 20 Peters, M.W., Pursley, J.R. and Smith, G.W. (2004) Inhibition of intrafollicular pge2 synthesis and ovulation following ultrasound-mediated intrafollicular injection of the selective cyclooxygenase-2 inhibitor ns-398 in cattle. *J. Anim. Sci.* **82**, 1656–1662, <https://doi.org/10.2527/2004.8261656x>
- 21 Downey, B.R. and Ainsworth, L. (1980) Reversal of indomethacin blockade of ovulation in gilts by prostaglandins. *Prostaglandins* **19**, 17–22, [https://doi.org/10.1016/0090-6980\(80\)90149-5](https://doi.org/10.1016/0090-6980(80)90149-5)
- 22 Davis, B.J., Lennard, D.E., Lee, C.A., Tiano, H.F., Morham, S.G., Wetsel, W.C. et al. (1999) Anovulation in cyclooxygenase-2-deficient mice is restored by prostaglandin e2 and interleukin-1beta. *Endocrinology* **140**, 2685–2695, <https://doi.org/10.1210/endo.140.6.6715>
- 23 Sinderewicz, E., Grycmacher, K., Boruszewska, D., Kowalczyk-Zięba, I. and Woclawek-Potocka, I. (2017) Lysophosphatidic acid expression in theca cells depends on the type of bovine ovarian follicle. *Reprod. Domest. Anim.* **52**, 28, <https://doi.org/10.1111/rda.12790>
- 24 Sinderewicz, E., Grycmacher, K., Boruszewska, D., Kowalczyk-Ziba, I., Staszkievicz, J., Ślęzak, T. et al. (2018) Bovine ovarian follicular growth and development correlate with lysophosphatidic acid expression. *Theriogenology* **106**, 1–14, <https://doi.org/10.1016/j.theriogenology.2017.09.027>
- 25 Wenyan, Guo, Jing, Cong and Wu, Xiaoke (2008) The role of steroid hormones in the development of follicles. *World J. Integr. Tradit. West Med.* **3**, 120–122
- 26 Watanabe, S., Tohma, Y., Chiba, H., Shimizu, Y., Saito, H. and Yanaiharu, T. (1994) Biochemical significance of 19-hydroxytestosterone in the process of aromatization in human corpus luteum. *Endocr. J.* **41**, 421–427, <https://doi.org/10.1507/endocrj.41.421>
- 27 Leschber, G., Nishino, Y. and Neumann, F. (1989) Influence of an aromatase inhibitor (4-acetoxy-4-androstene-3,17-dione) on experimentally induced impairment of spermatogenesis in immature rats. *Andrologia* **21**, 529–534, <https://doi.org/10.1111/j.1439-0272.1989.tb02465.x>
- 28 Revelli, A., Piane, L.D., Casano, S., Molinari, E., Massobrio, M. and Rinaudo, P. (2009) Follicular fluid content and oocyte quality: from single biochemical markers to metabolomics. *Reprod. Biol. Endocrinol.* **7**, 1–13, <https://doi.org/10.1186/1477-7827-7-40>
- 29 Kulmacz, R.J. (1987) Prostaglandin g2 levels during reaction of prostaglandin h synthase with arachidonic acid. *Prostaglandins* **34**, 225–240, [https://doi.org/10.1016/0090-6980\(87\)90246-2](https://doi.org/10.1016/0090-6980(87)90246-2)
- 30 Clark, S.R., Anning, P.B., Coffey, M.J., Roberts, A.G., Marnett, L.J. and O'Donnell, V.B. (2005) Depletion of inos-derived nitric oxide by prostaglandin h synthase-2 in inflammation-activated j774.2 macrophages through lipohydroperoxidase turnover. *Biochem. J.* **385**, 815, <https://doi.org/10.1042/BJ20041353>
- 31 Marques, C.C., Pereira, R.M., Vasques, M.I. and Baptista, M.C. (1997) Role of prostaglandins on bovine oocyte maturation in vitro. *Proceedings of the 1st Iberian Congress on Animal Reproduction*, Portuguese Society of Animal Reproduction, Ed. 2, 142–149
- 32 Lau, M.T., Wong, A.S. and Leung, P.C. (2010) Gonadotropins induce tumor cell migration and invasion by increasing cyclooxygenases expression and prostaglandin e(2) production in human ovarian cancer cells. *Endocrinol.* **151**, 2985, <https://doi.org/10.1210/en.2009-1318>
- 33 Cai, Z., Kwinkiewicz, J.M. and Stocco, C. (2007) Prostaglandin e2 increases cyp19 expression in rat granulosa cells: implication of gata-4. *Mol. Cell. Endocrinol.* **263**, 181–189, <https://doi.org/10.1016/j.mce.2006.09.012>
- 34 El-Nefiawy, N., Abdel-Hakim, K., Kanayama, N. and Terao, T. (2005) Role of prostaglandin e2 receptor subtypes in ovarian follicle growth in the rat in vivo. Correlation with interleukin-8 and neutrophils. *Histol. Histopathol.* **20**, 825
- 35 Laanpere, M., Aitmäe, S., Stavreus-Evers, A., Nilsson, T.K., Yngve, A. and Salumets, A. (2010) Folate-mediated one-carbon metabolism and its effect on female fertility and pregnancy viability. *Nutr. Rev.* **68**, 99–113, <https://doi.org/10.1111/j.1753-4887.2009.00266.x>
- 36 Rosen, M.P., Shen, S., McCulloch, C.E., Rinaudo, P.F., Cedars, M.I. and Dobson, A.T. (2007) Methylenetetrahydrofolate reductase (mthfr) is associated with ovarian follicular activity. *Fertil. Steril.* **88**, 632, <https://doi.org/10.1016/j.fertnstert.2006.11.165>
- 37 Javitt, N.B. (1994) Bile acid synthesis from cholesterol: regulatory and auxiliary pathways. *FASEB. J.* **8**, 1308–1311, <https://doi.org/10.1096/fasebj.8.15.8001744>
- 38 Suchanek, E., Simunić, V., Kopjar, B., Mačas, E., Grizelj, V., Salzer, B. et al. (1988) Lipid and lipoprotein contents of human follicular fluid. *Clin. Chem. Lab. Med.* **26**, 543–548, <https://doi.org/10.1515/cclm.1988.26.9.543>
- 39 McNatty, K.P., Makris, A., DeGrazia, C., Osathanondh, R. and Ryan, K.J. (1979) The production of progesterone, androgens, and estrogens by granulosa cells, thecal tissue, and stromal tissue from human ovaries in vitro. *J. Clin. Endocrinol. Metab.* **49**, 687–699, <https://doi.org/10.1210/jcem-49-5-687>
- 40 Franchimont, P., Hazez-Hagelstein, M.T., Hazout, A., Frydman, R., Schatz, B. et al. (1989) Correlation between follicular fluid content and the results of in vitro fertilization and embryo transfer. *Fertil. Steril.* **52**, 1006–1011, [https://doi.org/10.1016/S0015-0282\(16\)53166-5](https://doi.org/10.1016/S0015-0282(16)53166-5)

- 41 Smith, L.P., Nierstenhoefer, M., Yoo, S.W., Penzias, A.S., Tobiasch, E. and Usheva, A. (2009) The bile acid synthesis pathway is present and functional in the human ovary. *PLoS One* **4**, e7333, <https://doi.org/10.1371/journal.pone.0007333>
- 42 Esther, Jr, C.R., Coakley, R.D., Henderson, A.G., Zhou, Y.H., Wright, F.A. and Boucher, R.C. (2015) Metabolomic evaluation of neutrophilic airway inflammation in cystic fibrosis. *Chest* **148**, 507–515, <https://doi.org/10.1378/chest.14-1800>
- 43 Lavy, G., Behrman, H.R. and Polan, M.L. (1990) Purine levels and metabolism in human follicular fluid. *Hum. Reprod.* **5**, 529, <https://doi.org/10.1093/oxfordjournals.humrep.a137136>
- 44 Wen, X., Perrett, D., Jones, N., Tozer, A.J., Docherty, S.M. and Iles, R.K. (2010) High follicular fluid adenosine levels may be pivotal in the metabolism and recycling of adenosine nucleotides in the human follicle. *Metabolism* **59**, 1145–1155, <https://doi.org/10.1016/j.metabol.2009.09.037>
